# Supplementary material for: A Computational and Chemical Design Strategy for Manipulating Glycan‐Protein Recognition
Source: PubMed Central journal article supplement (PMC11199974; doi:10.1002/advs.202308522), 2024-04-06
Supplement: ADVS-11-2308522-s002.pdf [file ADVS-11-2308522-s002.pdf]

## Supporting Information

for *Adv. Sci.*, DOI 10.1002/adv.202308522

A Computational and Chemical Design Strategy for Manipulating Glycan-Protein Recognition

*Qiang Zhu, Didi Geng, Jingchao Li, Jinqiu Zhang, Haofan Sun, Zhiya Fan, Jiahui He, Ninghui Hao, Yinping Tian, Liuqing Wen, Tiehai Li, Weijie Qin, Xiakun Chu, Yong Wang\* and Wen Yi\**

## Supporting Information

## A Computational and Chemical Design Strategy for Manipulating Glycan-Protein Recognition

Qiang Zhu, Didi Geng, Jingchao Li, Jinqiu Zhang, Haofan Sun, Zhiya Fan, Jiahui He, Ninghui Hao, Yinping Tian, Liuqing Wen, Tiehai Li, Weijie Qin, Xiakun Chu, Yong Wang\*, and Wen Yi\*

## Supplementary material

## Supplementary Video legends

**Supplementary Video 1:** The 5-microsecond molecular dynamics simulation trajectory of PhoSL in complex with core fucose N-glycans. The three PhoSL protein monomers are depicted using ribbons colored green, cyan, and magenta. The core fucose N-glycan residues are shown as sticks with varying colors.

**Supplementary Video 2:** The 5-microsecond molecular dynamics simulation trajectory of the 5-methoxy tryptophan mutant of PhoSL in complex with core fucose N-glycans. The three PhoSL protein monomers are depicted using ribbons colored green, cyan, and magenta. The core fucose N-glycan residues are shown as sticks with varying colors. The 5-methoxy tryptophan residues are represented by spheres.

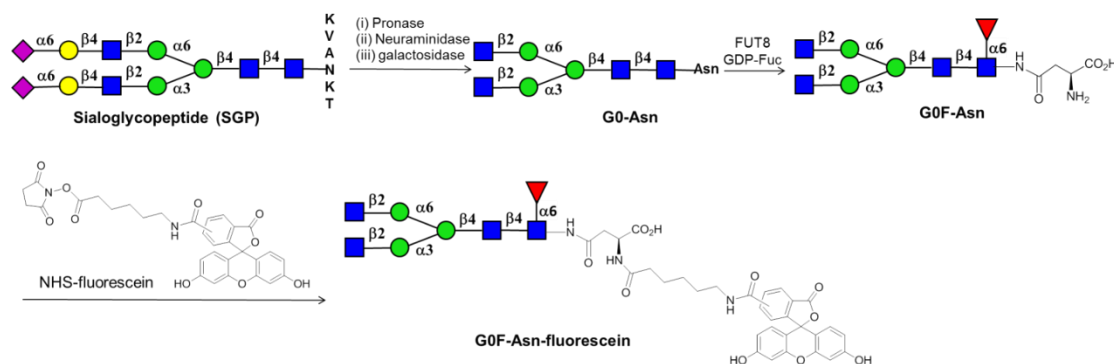

**Figure S1.** The preparation of G0F-Asn-fluorescein **1** (synthetic details see Methods)

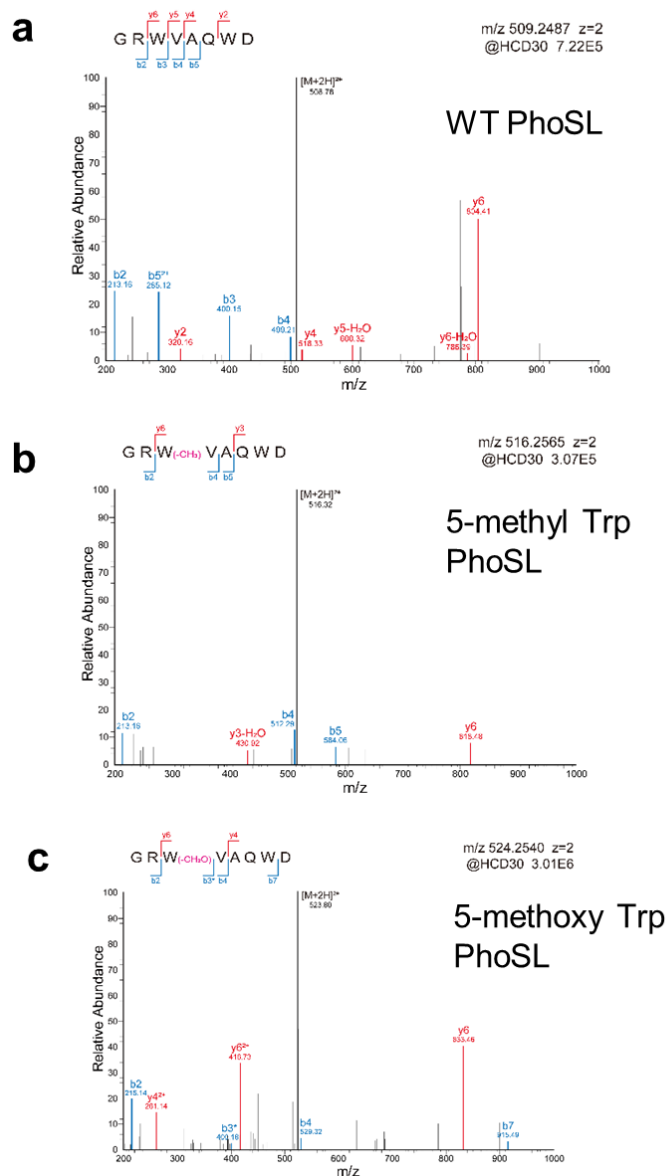

**Figure S2.** Site mapping of the modification sites of WT (a), 5-methyl Trp incorporated (b), and 5-methoxy Trp incorporated (c) PhoSL.

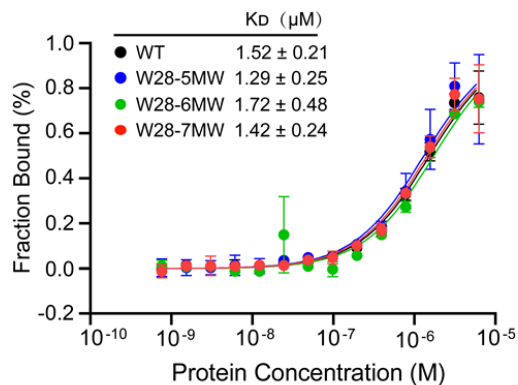

**Figure S3.** The binding affinity of the WT and different variants of PhoSL toward the core fucose glycan substrate **1** as measured by microscale thermophoresis. Error bars denote the means  $\pm$  SD in three independent assays.

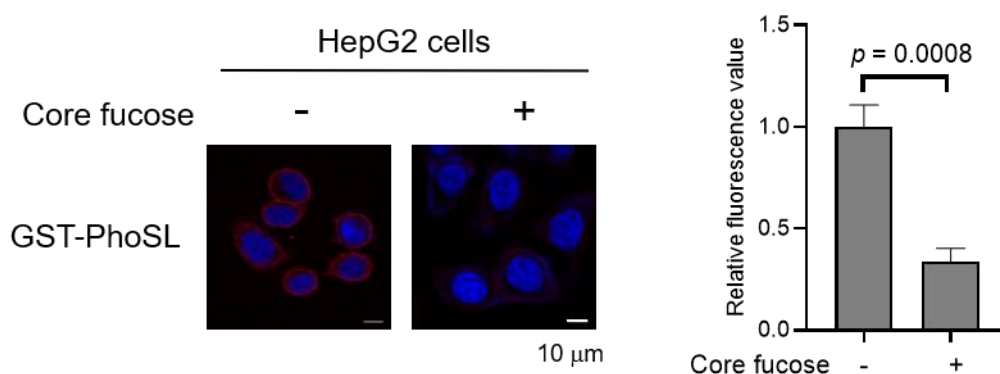

**Figure S4.** Immunofluorescence analysis of core fucose glycans on HepG2 cell surface using GST-tagged PhoSL in the presence or absence of the core fucose substrate. The relative values were determined by Image J ( $n=3$  independent assays). Scale bar: 10  $\mu$ m. Error bars denote the mean  $\pm$  SD. Statistical analyses were performed by unpaired two-tailed Student's t-tests.

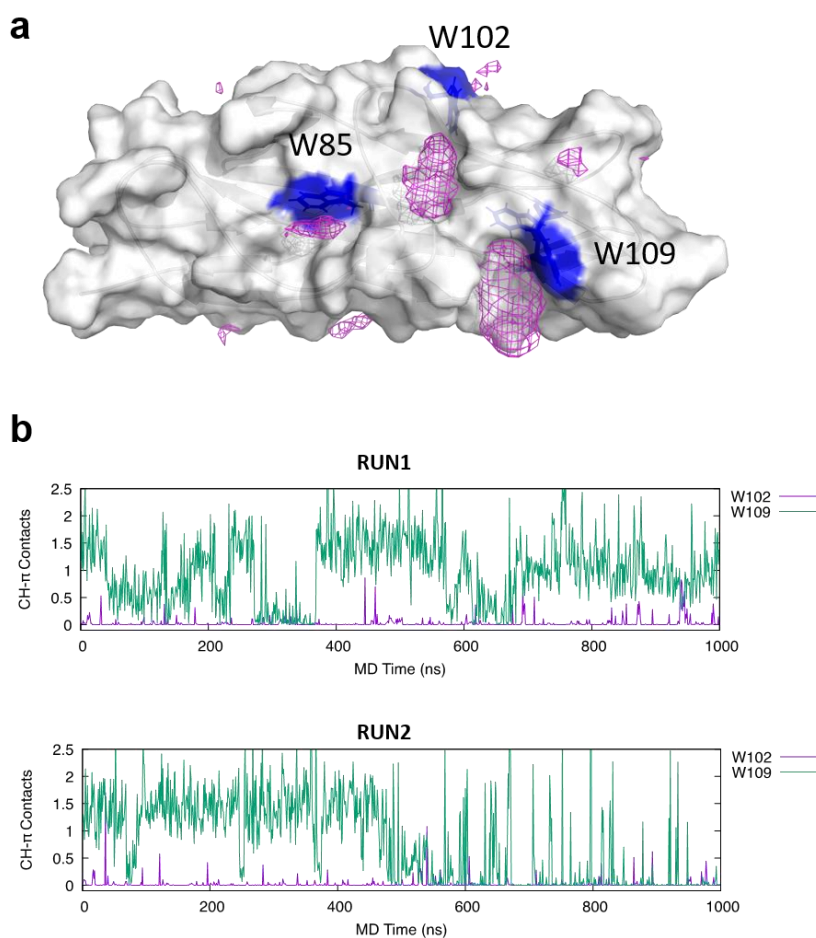

**Figure S5. W109 is a critical residue for GlcNAc-containing glycan recognition by GafD.** (a), The energy minimized crystal structure of the glycan binding site of GafD in complex with the GlcNAc-containing glycan (PDB: 1OI0). (b), The CH- $\pi$  contacts between the aromatic residues W102 and W109 of GafD and the CH groups of the glycan, shown as a function of simulation time in two independent 1000 ns MD simulations.

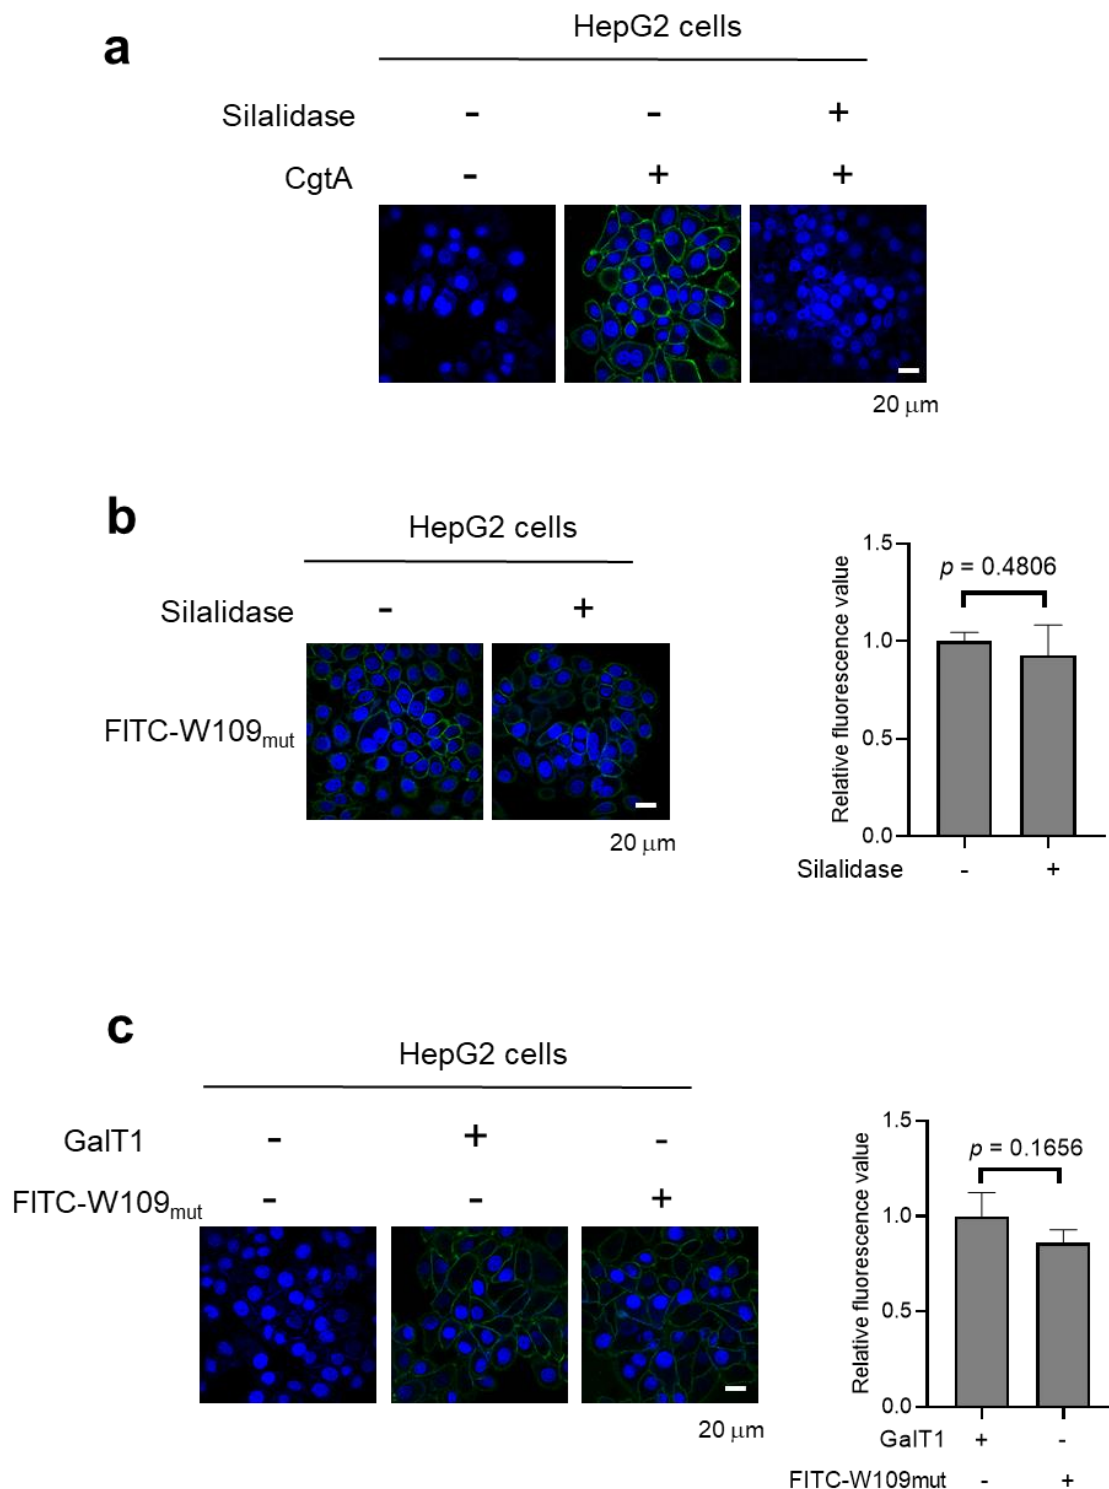

**Figure S6.** (a), Immunofluorescence analysis of sialylation on the cell surface by a CgtA mediated chemoenzymatic labeling strategy. (b), Immunofluorescence analysis of GlcNAc-containing glycans on HepG2 cell surface in the presence or absence of sialidase. (c), Immunofluorescence analysis of GlcNAc-containing glycans on HepG2 cell surface using

GaT1 mediated chemoenzymatic labeling strategy of FITC-W109<sub>mut</sub>. The relative values were determined by Image J (n= 3 independent assays). Scale bar: 10 μm. Error bars denote the mean ± SD. Statistical analyses were performed by unpaired two-tailed Student's t-tests.

### Compound characterization spectra

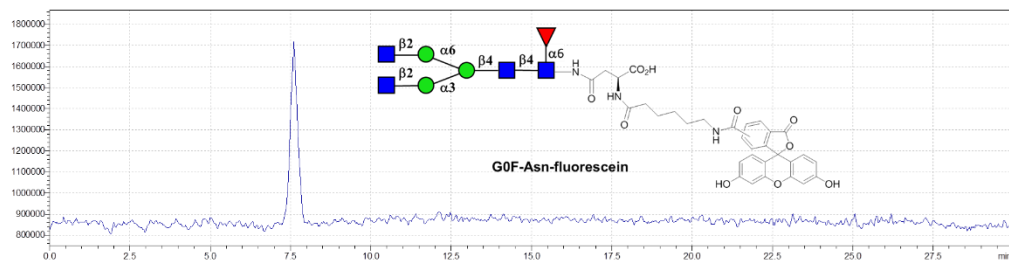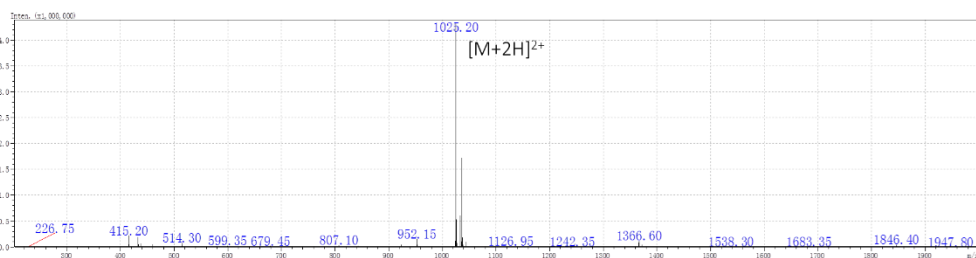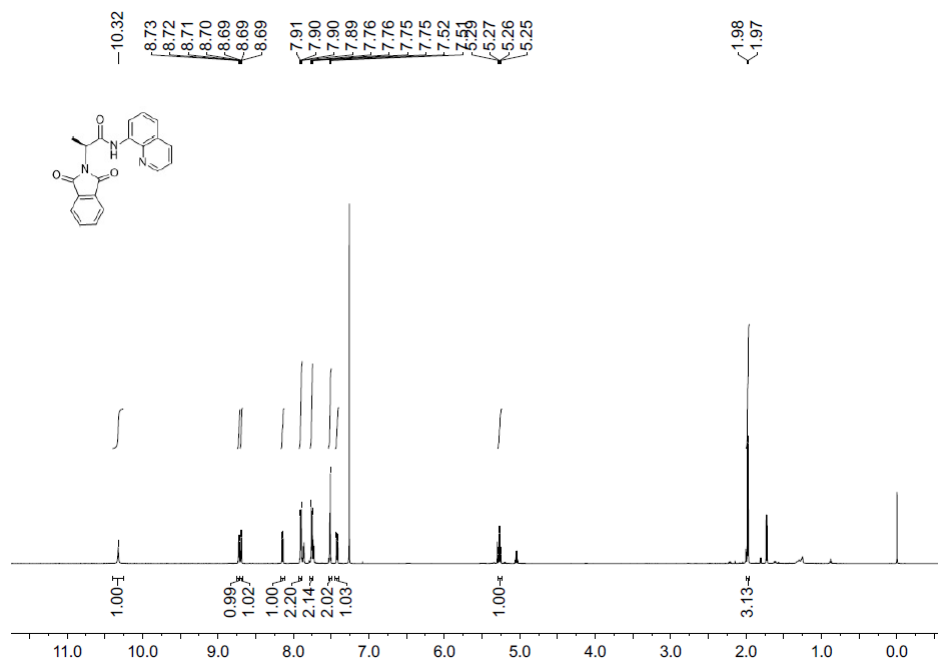

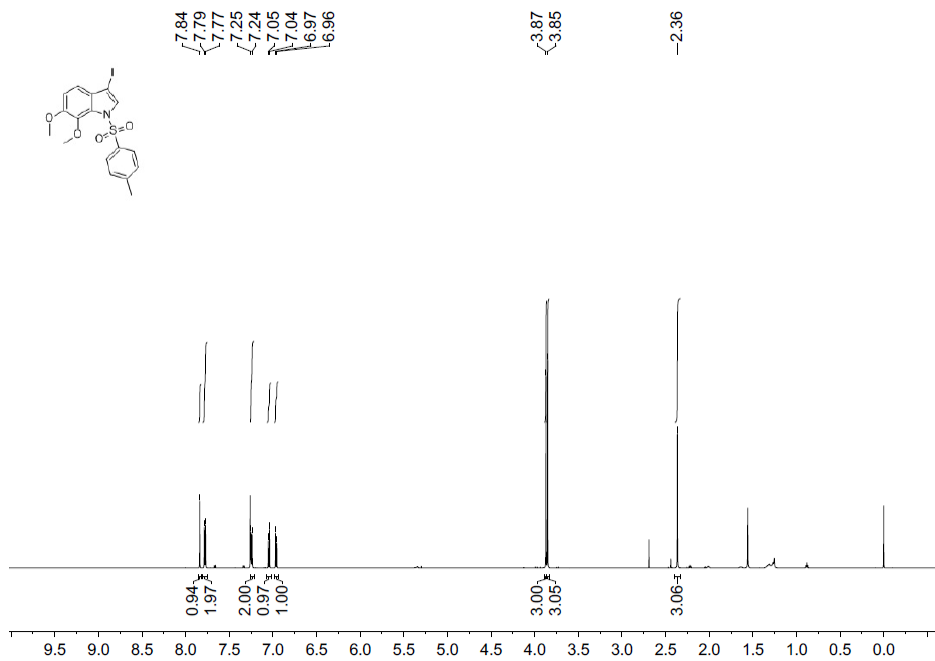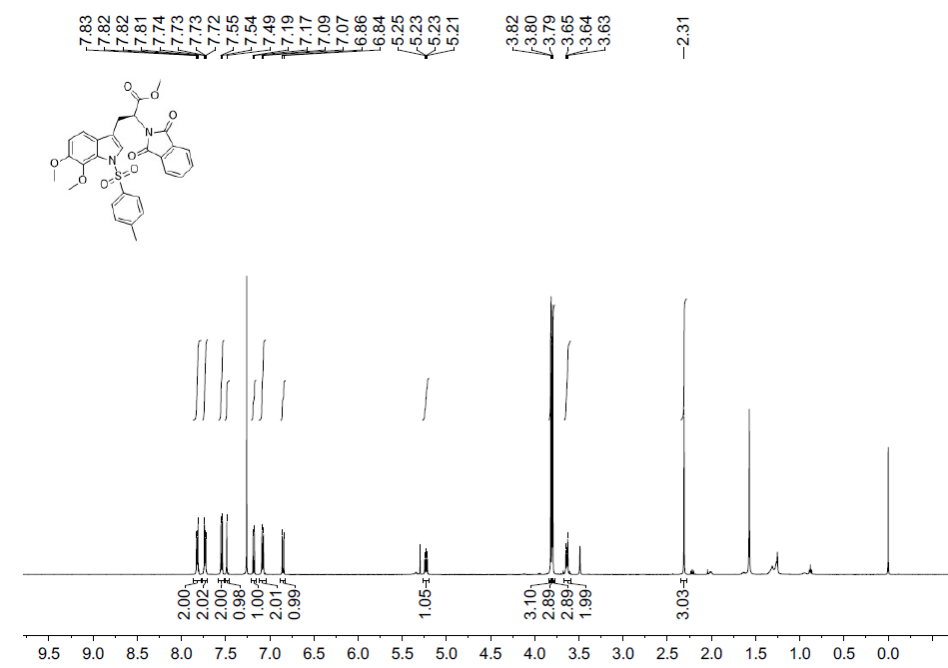

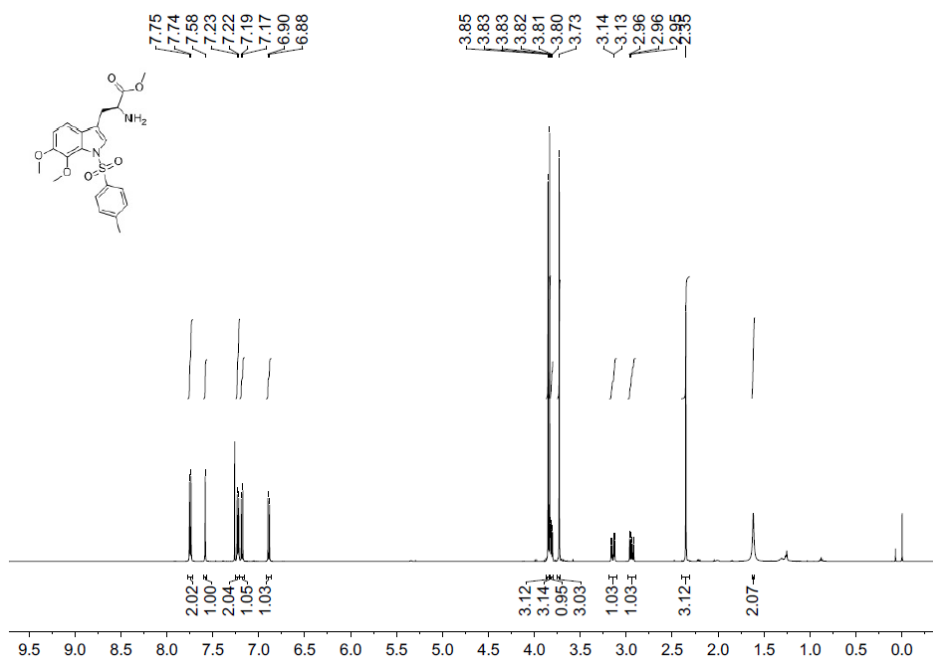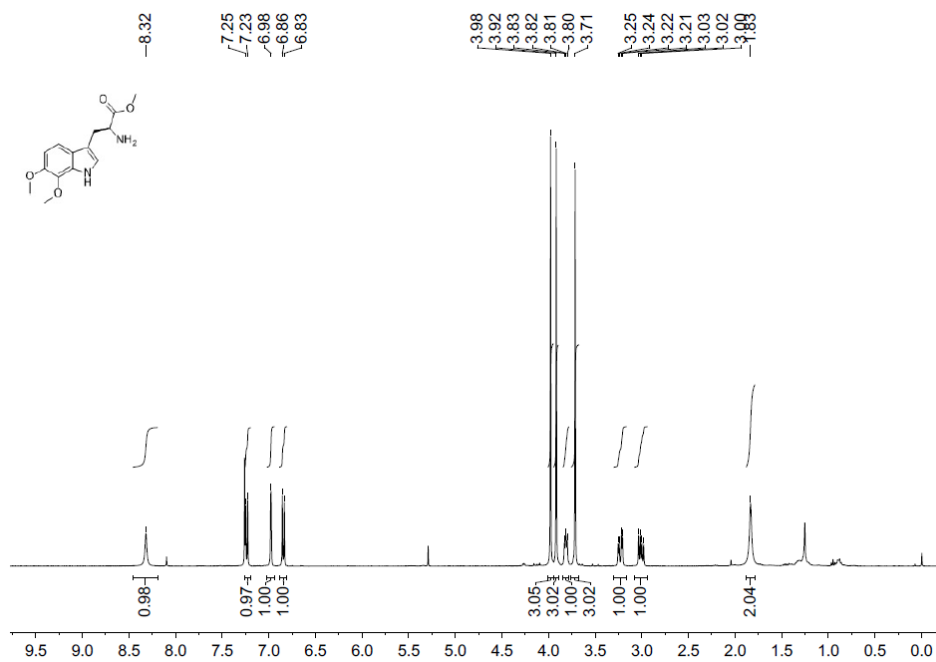



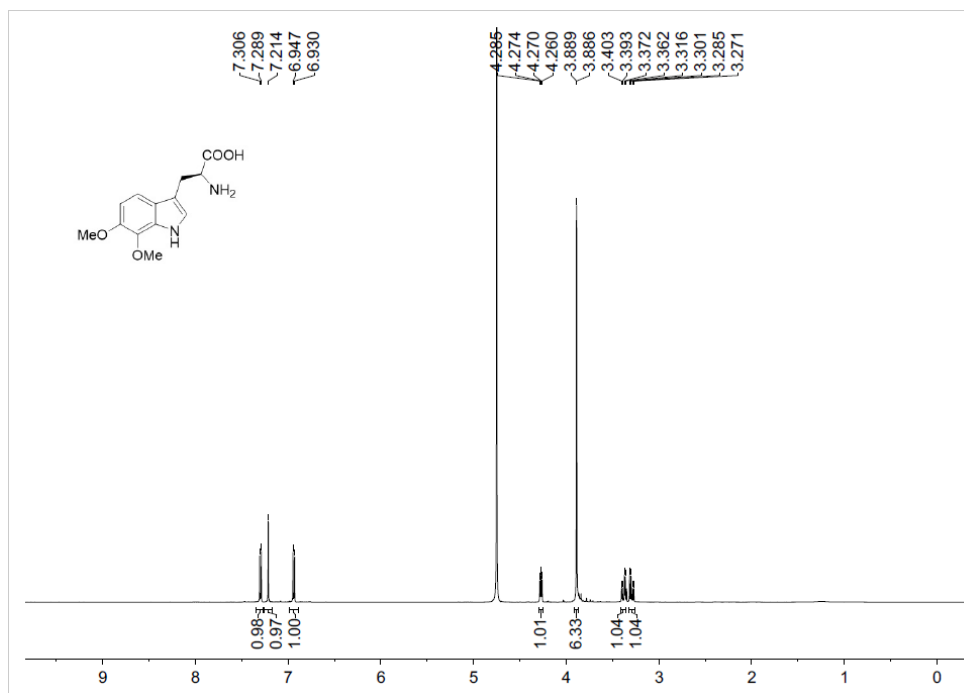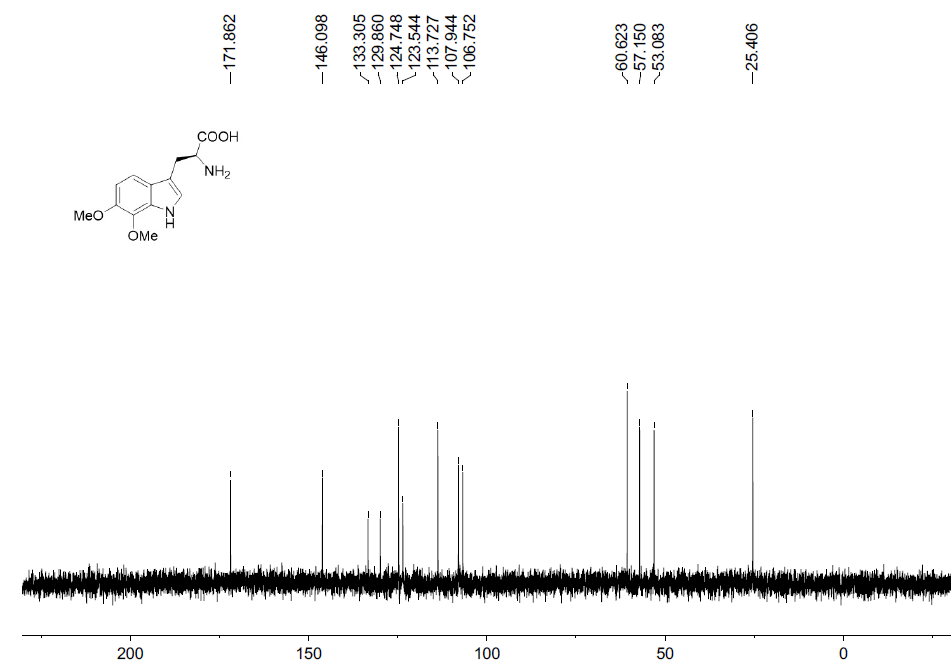

## User Spectra

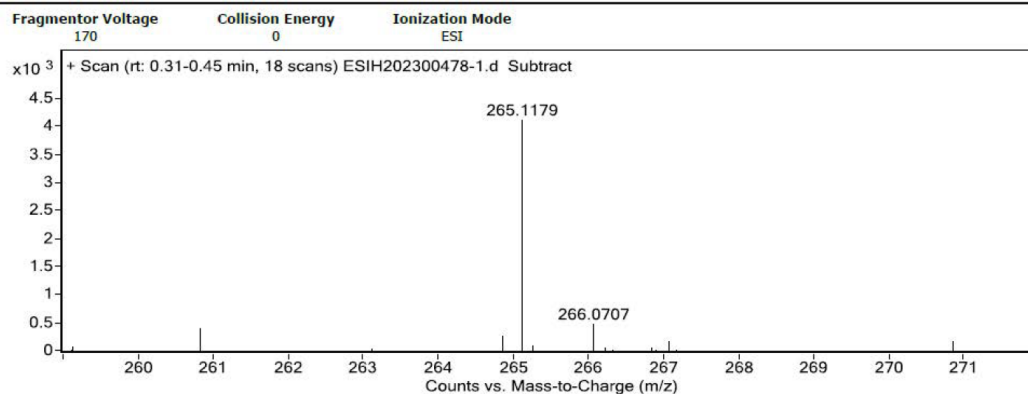

## Formula Calculator Results

| m/z      | Calc m/z | Diff (mDa) | Diff (ppm) | Ion Formula                                                   | Ion                |
|----------|----------|------------|------------|---------------------------------------------------------------|--------------------|
| 265.1179 | 265.1183 | 0.41       | 1.53       | C <sub>13</sub> H <sub>17</sub> N <sub>2</sub> O <sub>4</sub> | (M+H) <sup>+</sup> |

--- End Of Report ---

Table S1. 451 core-fucosylated proteins were identified in HepG2 cells.

| Uniprot ID | Gene names | Overlap with Cao <i>et al.</i> (Nature Communications, 2022) | Overlap with Jia <i>et al.</i> (Theranostics, 2021) | Overlap with Luo <i>et al.</i> (Journal of the American Chemical Society, 2023) |
|------------|------------|--------------------------------------------------------------|-----------------------------------------------------|---------------------------------------------------------------------------------|
| Q8NBJ5     | COLGALT1   | YES                                                          | YES                                                 | YES                                                                             |
| Q4KMQ2     | ANO6       | YES                                                          | YES                                                 | YES                                                                             |
| Q10589     | BST2       | YES                                                          | YES                                                 | NO                                                                              |
| P08195     | SLC3A2     | YES                                                          | YES                                                 | YES                                                                             |
| P07339     | CTSD       | YES                                                          | YES                                                 | NO                                                                              |
| Q08722     | CD47       | YES                                                          | YES                                                 | YES                                                                             |
| Q9Y639     | NPTN       | YES                                                          | YES                                                 | YES                                                                             |
| Q6UVK1     | CSPG4      | YES                                                          | YES                                                 | NO                                                                              |
| P00533     | EGFR       | YES                                                          | YES                                                 | YES                                                                             |
| P35613     | BSG        | YES                                                          | YES                                                 | YES                                                                             |
| Q14126     | DSG2       | YES                                                          | YES                                                 | YES                                                                             |
| P78406     | RAE1       | YES                                                          | YES                                                 | NO                                                                              |
| P32004     | L1CAM      | YES                                                          | YES                                                 | YES                                                                             |
| P11717     | IGF2R      | YES                                                          | YES                                                 | YES                                                                             |
| P15529     | CD46       | YES                                                          | YES                                                 | NO                                                                              |
| P26006     | ITGA3      | YES                                                          | YES                                                 | YES                                                                             |
| P16070     | CD44       | YES                                                          | YES                                                 | NO                                                                              |
| P06756     | ITGAV      | YES                                                          | YES                                                 | YES                                                                             |
| P05556     | ITGB1      | YES                                                          | YES                                                 | YES                                                                             |
| P48960     | CD97       | YES                                                          | YES                                                 | NO                                                                              |
| P56199     | ITGA1      | YES                                                          | YES                                                 | YES                                                                             |
| Q14571     | ITPR2      | YES                                                          | YES                                                 | YES                                                                             |
| Q6YHK3     | CD109      | YES                                                          | YES                                                 | YES                                                                             |
| Q13740     | ALCAM      | YES                                                          | YES                                                 | YES                                                                             |
| Q9P2B2     | PTGFRN     | YES                                                          | YES                                                 | NO                                                                              |
| P43121     | MCAM       | YES                                                          | YES                                                 | NO                                                                              |
| Q6P4Q7     | CNNM4      | YES                                                          | YES                                                 | NO                                                                              |
| Q07954     | LRP1       | YES                                                          | YES                                                 | YES                                                                             |

|        |         |     |     |     |
|--------|---------|-----|-----|-----|
| P08648 | ITGA5   | YES | YES | YES |
| P17301 | ITGA2   | YES | YES | YES |
| P06213 | INSR    | YES | YES | YES |
| O94901 | SUN1    | YES | YES | YES |
| P20645 | M6PR    | YES | YES | YES |
| P19022 | CDH2    | YES | YES | YES |
| Q9UGT4 | SUSD2   | YES | YES | NO  |
| Q9Y6N7 | ROBO1   | YES | YES | YES |
| P18084 | ITGB5   | YES | YES | YES |
| Q92508 | PIEZO1  | YES | YES | NO  |
| P53634 | CTSC    | YES | YES | YES |
| O00469 | PLOD2   | YES | YES | YES |
| P05362 | ICAM1   | YES | YES | YES |
| P23229 | ITGA6   | YES | YES | YES |
| Q9Y4D7 | PLXND1  | YES | YES | NO  |
| O15031 | PLXNB2  | YES | YES | YES |
| Q9BVK6 | TMED9   | YES | YES | YES |
| Q15181 | PPA1    | YES | NO  | NO  |
| Q13263 | TRIM28  | YES | NO  | NO  |
| Q7Z6Z7 | HUWE1   | YES | NO  | NO  |
| O60763 | USO1    | YES | NO  | NO  |
| Q14980 | NUMA1   | YES | NO  | NO  |
| O94906 | PRPF6   | YES | NO  | NO  |
| Q9NzM1 | MYOF    | YES | NO  | NO  |
| Q14118 | DAG1    | YES | NO  | YES |
| Q99614 | TTC1    | YES | NO  | NO  |
| Q13501 | SQSTM1  | YES | NO  | NO  |
| Q9NQC3 | RTN4    | YES | NO  | NO  |
| P29144 | TPP2    | YES | NO  | NO  |
| Q12769 | NUP160  | YES | NO  | NO  |
| Q8TAQ2 | SMARCC2 | YES | NO  | NO  |
| Q92945 | KHSRP   | YES | NO  | NO  |
| Q7Z2K6 | ERMP1   | YES | NO  | NO  |
| Q13813 | SPTAN1  | YES | NO  | NO  |
| P52948 | NUP98   | YES | NO  | NO  |
| P17655 | CAPN2   | YES | NO  | NO  |
| P04632 | CAPNS1  | YES | NO  | NO  |
| Q6P2Q9 | PRPF8   | YES | NO  | NO  |
| Q96I24 | FUBP3   | YES | NO  | NO  |
| P51610 | HCFC1   | YES | NO  | NO  |
| Q63HN8 | RNF213  | YES | NO  | NO  |
| Q14008 | CKAP5   | YES | NO  | NO  |
| P08581 | MET     | YES | NO  | 1   |
| Q8NBU5 | ATAD1   | YES | NO  | NO  |
| Q96ST3 | SIN3A   | YES | NO  | NO  |
| Q6P2E9 | EDC4    | YES | NO  | NO  |
| P33176 | KIF5B   | YES | NO  | NO  |
| Q9UPN3 | MACF1   | YES | NO  | NO  |
| Q8NC42 | RNF149  | YES | NO  | YES |
| Q14157 | UBAP2L  | YES | NO  | NO  |
| Q5VT52 | RPRD2   | YES | NO  | NO  |

|        |         |     |     |     |
|--------|---------|-----|-----|-----|
| P46939 | UTRN    | YES | NO  | NO  |
| P42285 | SKIV2L2 | YES | NO  | NO  |
| Q14789 | GOLGB1  | YES | NO  | NO  |
| Q6P1M0 | SLC27A4 | YES | NO  | NO  |
| P42765 | ACAA2   | YES | NO  | NO  |
| Q9H0X4 | ITFG3   | YES | NO  | YES |
| P56537 | EIF6    | YES | NO  | NO  |
| Q13561 | DCTN2   | YES | NO  | NO  |
| P17813 | ENG     | YES | NO  | NO  |
| P52294 | KPNA1   | YES | NO  | NO  |
| Q99808 | SLC29A1 | YES | NO  | NO  |
| Q5JRA6 | MIA3    | YES | NO  | YES |
| Q12913 | PTPRJ   | YES | NO  | YES |
| P61160 | ACTR2   | YES | NO  | NO  |
| Q9UHD8 | SEPT9   | YES | NO  | NO  |
| Q15369 | TCEB1   | YES | NO  | NO  |
| O75179 | ANKRD17 | YES | NO  | NO  |
| Q9UPN9 | TRIM33  | YES | NO  | NO  |
| Q13620 | CUL4B   | YES | NO  | NO  |
| P38435 | GGCX    | YES | NO  | YES |
| P51116 | FXR2    | YES | NO  | NO  |
| Q9NTJ5 | SACM1L  | YES | NO  | NO  |
| Q687X5 | STEAP4  | YES | NO  | NO  |
| Q7L2H7 | EIF3M   | YES | NO  | NO  |
| O75694 | NUP155  | YES | NO  | NO  |
| Q9Y4P3 | TBL2    | YES | NO  | NO  |
| O60716 | CTNND1  | YES | NO  | NO  |
| P51649 | ALDH5A1 | YES | NO  | NO  |
| Q8WTV0 | SCARB1  | YES | NO  | YES |
| Q9Y223 | GENE    | YES | NO  | NO  |
| Q96RQ1 | ERGIC2  | YES | NO  | NO  |
| Q9ULC5 | ACSL5   | YES | NO  | NO  |
| Q9NX40 | OCIAD1  | YES | NO  | NO  |
| O94855 | SEC24D  | YES | NO  | NO  |
| O75907 | DGAT1   | YES | NO  | NO  |
| Q53H82 | LACTB2  | YES | NO  | NO  |
| Q93100 | PHKB    | YES | NO  | NO  |
| P30530 | AXL     | YES | NO  | NO  |
| Q9H4A4 | RNPEP   | YES | NO  | NO  |
| Q709C8 | VPS13C  | NO  | YES | NO  |
| P05187 | ALPP    | NO  | YES | NO  |
| P61011 | SRP54   | NO  | YES | NO  |
| P46379 | BAG6    | NO  | YES | NO  |
| O75534 | CSDE1   | NO  | YES | NO  |
| P08174 | CD55    | NO  | YES | NO  |
| O00592 | PODXL   | NO  | YES | NO  |
| P15151 | PVR     | NO  | YES | YES |
| P48509 | CD151   | NO  | YES | NO  |
| P33527 | ABCC1   | NO  | YES | NO  |
| P12270 | TPR     | NO  | YES | NO  |
| Q9BWF3 | RBM4    | NO  | YES | NO  |

|        |           |    |     |    |
|--------|-----------|----|-----|----|
| Q5JPE7 | NOMO2     | NO | YES | NO |
| O75592 | MYCBP2    | NO | YES | NO |
| Q7Z460 | CLASP1    | NO | YES | NO |
| Q7Z3B4 | NUP54     | NO | YES | NO |
| Q92769 | HDAC2     | NO | NO  | NO |
| P46778 | RPL21     | NO | NO  | NO |
| Q13286 | CLN3      | NO | NO  | NO |
| Q6DD88 | ATL3      | NO | NO  | NO |
| Q01650 | SLC7A5    | NO | NO  | NO |
| P49755 | TMED10    | NO | NO  | NO |
| P10398 | ARAF      | NO | NO  | NO |
| P48775 | TDO2      | NO | NO  | NO |
| Q8NFJ5 | GPRC5A    | NO | NO  | NO |
| Q92643 | PIGK      | NO | NO  | NO |
| Q14318 | FKBP8     | NO | NO  | NO |
| Q8WUY1 | THEM6     | NO | NO  | NO |
| Q5SRE5 | NUP188    | NO | NO  | NO |
| Q6PGP7 | TTC37     | NO | NO  | NO |
| P37235 | HPCAL1    | NO | NO  | NO |
| Q9Y6C9 | MTCH2     | NO | NO  | NO |
| P30043 | BLVRB     | NO | NO  | NO |
| P42345 | MTOR      | NO | NO  | NO |
| Q9H4L4 | SENP3     | NO | NO  | NO |
| O75531 | BANF1     | NO | NO  | NO |
| O00232 | PSMD12    | NO | NO  | NO |
| Q9UKN8 | GTF3C4    | NO | NO  | NO |
| Q9H3U1 | UNC45A    | NO | NO  | NO |
| P46013 | MKI67     | NO | NO  | NO |
| Q9BW27 | NUP85     | NO | NO  | NO |
| Q16850 | CYP51A1   | NO | NO  | NO |
| P43007 | SLC1A4    | NO | NO  | NO |
| Q9Y3L5 | RAP2C     | NO | NO  | NO |
| P36957 | DLST      | NO | NO  | NO |
| Q9BTX1 | NDC1      | NO | NO  | NO |
| Q01628 | IFITM3    | NO | NO  | NO |
| Q14738 | PPP2R5D   | NO | NO  | NO |
| Q9Y6Y8 | SEC23IP   | NO | NO  | NO |
| Q5VYK3 | ECM29     | NO | NO  | NO |
| Q9Y224 | C14orf166 | NO | NO  | NO |
| Q15021 | NCAPD2    | NO | NO  | NO |
| P58107 | EPPK1     | NO | NO  | NO |
| Q14697 | GANAB     | NO | NO  | NO |
| O96008 | TOMM40    | NO | NO  | NO |
| O43169 | CYB5B     | NO | NO  | NO |
| Q29RF7 | PDS5A     | NO | NO  | NO |
| O75165 | DNAJC13   | NO | NO  | NO |
| Q9NX47 | MARCHF5   | NO | NO  | NO |
| Q9UK22 | FBXO2     | NO | NO  | NO |
| Q969Z0 | TBRG4     | NO | NO  | NO |
| P23634 | ATP2B4    | NO | NO  | NO |
| A5YKK6 | CNOT1     | NO | NO  | NO |

|        |         |    |    |     |
|--------|---------|----|----|-----|
| Q9HAV4 | XPO5    | NO | NO | NO  |
| P51812 | RPS6KA3 | NO | NO | NO  |
| Q9UJX3 | ANAPC7  | NO | NO | NO  |
| Q6NUQ4 | TMEM214 | NO | NO | NO  |
| P53992 | SEC24C  | NO | NO | NO  |
| O00410 | IPO5    | NO | NO | NO  |
| O43143 | DHX15   | NO | NO | NO  |
| P53396 | ACLY    | NO | NO | NO  |
| Q92621 | NUP205  | NO | NO | NO  |
| Q8NBM4 | UBAC2   | NO | NO | NO  |
| P53794 | SLC5A3  | NO | NO | NO  |
| O75648 | TRMU    | NO | NO | NO  |
| Q96SK2 | TMEM209 | NO | NO | NO  |
| Q6NUT3 | MFSD12  | NO | NO | NO  |
| Q99567 | NUP88   | NO | NO | NO  |
| Q8TCT9 | HM13    | NO | NO | NO  |
| Q9UGP8 | SEC63   | NO | NO | NO  |
| P84085 | ARF5    | NO | NO | NO  |
| Q86W42 | THOC6   | NO | NO | NO  |
| P15941 | MUC1    | NO | NO | NO  |
| P55265 | ADAR    | NO | NO | NO  |
| Q92600 | RQCD1   | NO | NO | NO  |
| Q9UI26 | IPO11   | NO | NO | NO  |
| Q9Y6M7 | SLC4A7  | NO | NO | YES |
| P62330 | ARF6    | NO | NO | NO  |
| P37268 | FDFT1   | NO | NO | NO  |
| O43390 | HNRNPR  | NO | NO | NO  |
| Q08752 | PPID    | NO | NO | NO  |
| Q9BZZ5 | API5    | NO | NO | NO  |
| Q13325 | IFIT5   | NO | NO | NO  |
| Q09161 | NCBP1   | NO | NO | NO  |
| Q9Y262 | EIF3L   | NO | NO | NO  |
| Q04760 | GLO1    | NO | NO | NO  |
| Q92538 | GBF1    | NO | NO | NO  |
| P22234 | PAICS   | NO | NO | NO  |
| Q5SY16 | NOL9    | NO | NO | NO  |
| Q9UBQ5 | EIF3K   | NO | NO | NO  |
| Q9NVI1 | FANCI   | NO | NO | NO  |
| O43684 | BUB3    | NO | NO | NO  |
| O43688 | PPAP2C  | NO | NO | NO  |
| P30260 | CDC27   | NO | NO | NO  |
| Q9H4A3 | WNK1    | NO | NO | NO  |
| P60033 | CD81    | NO | NO | NO  |
| O14880 | MGST3   | NO | NO | NO  |
| O14929 | HAT1    | NO | NO | NO  |
| Q9NPQ8 | RIC8A   | NO | NO | NO  |
| Q92734 | TFG     | NO | NO | NO  |
| Q7L5D6 | GET4    | NO | NO | NO  |
| Q13547 | HDAC1   | NO | NO | NO  |
| Q14534 | SQLE    | NO | NO | NO  |
| Q99615 | DNAJC7  | NO | NO | NO  |

|        |          |    |    |     |
|--------|----------|----|----|-----|
| Q02218 | OGDH     | NO | NO | NO  |
| Q9BTV4 | TMEM43   | NO | NO | NO  |
| P57678 | GEMIN4   | NO | NO | NO  |
| Q9H2H9 | SLC38A1  | NO | NO | NO  |
| O00560 | SDCBP    | NO | NO | NO  |
| Q9BUP3 | HTATIP2  | NO | NO | NO  |
| Q15459 | SF3A1    | NO | NO | NO  |
| Q6R327 | RICTOR   | NO | NO | NO  |
| O95139 | NDUFB6   | NO | NO | NO  |
| Q14573 | ITPR3    | NO | NO | NO  |
| P61289 | PSME3    | NO | NO | NO  |
| P55735 | SEC13    | NO | NO | NO  |
| P37198 | NUP62    | NO | NO | NO  |
| Q9BYX2 | TBC1D2   | NO | NO | NO  |
| O75367 | H2AFY    | NO | NO | NO  |
| P49821 | NDUFV1   | NO | NO | NO  |
| O75643 | SNRNP200 | NO | NO | NO  |
| O15397 | IPO8     | NO | NO | NO  |
| P41223 | BUD31    | NO | NO | NO  |
| Q5UIP0 | RIF1     | NO | NO | NO  |
| Q15393 | SF3B3    | NO | NO | NO  |
| P57740 | NUP107   | NO | NO | NO  |
| Q96KR1 | ZFR      | NO | NO | NO  |
| P30519 | HMOX2    | NO | NO | NO  |
| O95714 | HERC2    | NO | NO | NO  |
| Q9Y6M5 | SLC30A1  | NO | NO | NO  |
| Q9UNQ0 | ABCG2    | NO | NO | NO  |
| P43304 | GPD2     | NO | NO | NO  |
| Q9Y4W2 | LAS1L    | NO | NO | NO  |
| Q07864 | POLE     | NO | NO | NO  |
| P16152 | CBR1     | NO | NO | NO  |
| Q8IX12 | CCAR1    | NO | NO | NO  |
| O95239 | KIF4A    | NO | NO | NO  |
| P61769 | B2M      | NO | NO | NO  |
| Q9ULX6 | AKAP8L   | NO | NO | NO  |
| Q9BVL2 | NUPL1    | NO | NO | NO  |
| Q9Y6D5 | ARFGEF2  | NO | NO | NO  |
| P56282 | POLE2    | NO | NO | NO  |
| Q9BXB5 | OSBPL10  | NO | NO | NO  |
| O60664 | PLIN3    | NO | NO | NO  |
| Q9UPY5 | SLC7A11  | NO | NO | NO  |
| P04920 | SLC4A2   | NO | NO | NO  |
| Q9H583 | HEATR1   | NO | NO | NO  |
| Q9UNE7 | STUB1    | NO | NO | NO  |
| Q99873 | PRMT1    | NO | NO | NO  |
| Q9H1K1 | ISCU     | NO | NO | NO  |
| O95453 | PARN     | NO | NO | YES |
| O43670 | ZNF207   | NO | NO | NO  |
| Q9BQA1 | WDR77    | NO | NO | NO  |
| Q08379 | GOLGA2   | NO | NO | NO  |
| Q9Y289 | SLC5A6   | NO | NO | NO  |

|        |         |    |    |    |
|--------|---------|----|----|----|
| Q14139 | UBE4A   | NO | NO | NO |
| O95336 | PGLS    | NO | NO | NO |
| P00492 | HPRT1   | NO | NO | NO |
| Q9UGI8 | TES     | NO | NO | NO |
| Q9H3S7 | PTPN23  | NO | NO | NO |
| O60566 | BUB1B   | NO | NO | NO |
| P57105 | SYNJ2BP | NO | NO | NO |
| Q8ND04 | SMG8    | NO | NO | NO |
| O75683 | SURF6   | NO | NO | NO |
| Q9BZK7 | TBL1XR1 | NO | NO | NO |
| O14744 | PRMT5   | NO | NO | NO |
| Q7Z4H7 | HAUS6   | NO | NO | NO |
| Q9UDY8 | MALT1   | NO | NO | NO |
| P46087 | NOP2    | NO | NO | NO |
| Q15058 | KIF14   | NO | NO | NO |
| Q13315 | ATM     | NO | NO | NO |
| Q9BXW9 | FANCD2  | NO | NO | NO |
| O15403 | SLC16A6 | NO | NO | NO |
| P69905 | HBA1    | NO | NO | NO |
| O60645 | EXOC3   | NO | NO | NO |
| Q9BTE3 | MCMBP   | NO | NO | NO |
| Q86VM9 | ZC3H18  | NO | NO | NO |
| Q9UJX4 | ANAPC5  | NO | NO | NO |
| Q9HD33 | MRPL47  | NO | NO | NO |
| Q9ULQ1 | TPCN1   | NO | NO | NO |
| Q15022 | SUZ12   | NO | NO | NO |
| Q14690 | PDCD11  | NO | NO | NO |
| Q9UNN5 | FAF1    | NO | NO | NO |
| Q32MZ4 | LRRFIP1 | NO | NO | NO |
| O94822 | LTN1    | NO | NO | NO |
| Q7L1W4 | LRRC8D  | NO | NO | NO |
| O15372 | EIF3H   | NO | NO | NO |
| P19784 | CSNK2A2 | NO | NO | NO |
| Q12788 | TBL3    | NO | NO | NO |
| O14646 | CHD1    | NO | NO | NO |
| P51532 | SMARCA4 | NO | NO | NO |
| Q5SNT2 | TMEM201 | NO | NO | NO |
| Q8IWT6 | LRRC8A  | NO | NO | NO |
| O95169 | NDUFB8  | NO | NO | NO |
| Q8IZV5 | RDH10   | NO | NO | NO |
| P16066 | NPR1    | NO | NO | NO |
| Q15751 | HERC1   | NO | NO | NO |
| Q6NXE6 | ARMC6   | NO | NO | NO |
| Q9C0D5 | TANC1   | NO | NO | NO |
| Q9UHY1 | NRBP1   | NO | NO | NO |
| Q9UPT5 | EXOC7   | NO | NO | NO |
| A6NHR9 | SMCHD1  | NO | NO | NO |
| Q13409 | DYNC112 | NO | NO | NO |
| P61201 | COPS2   | NO | NO | NO |
| P62995 | TRA2B   | NO | NO | NO |
| Q9UKX7 | NUP50   | NO | NO | NO |



|        |           |    |    |    |
|--------|-----------|----|----|----|
| Q96C36 | PYCR2     | NO | NO | NO |
| Q9Y3E5 | PTRH2     | NO | NO | NO |
| Q9BVG8 | KIFC3     | NO | NO | NO |
| P30876 | POLR2B    | NO | NO | NO |
| Q8IUC1 | KRTAP11-1 | NO | NO | NO |
| Q8NEB9 | PIK3C3    | NO | NO | NO |
| A6NDG6 | PGP       | NO | NO | NO |
| Q16181 | SEPT7     | NO | NO | NO |
| P24928 | POLR2A    | NO | NO | NO |
| O60518 | RANBP6    | NO | NO | NO |
| O60318 | MCM3AP    | NO | NO | NO |
| Q96EE3 | SEH1L     | NO | NO | NO |
| Q9BY44 | EIF2A     | NO | NO | NO |
| P31641 | SLC6A6    | NO | NO | NO |
| Q9UL15 | BAG5      | NO | NO | NO |
| P55036 | PSMD4     | NO | NO | NO |
| P55017 | SLC12A3   | NO | NO | NO |
| Q5H9R7 | PPP6R3    | NO | NO | NO |
| O60825 | PFKFB2    | NO | NO | NO |
| Q8N2K0 | ABHD12    | NO | NO | NO |
| Q8IWZ3 | ANKHD1    | NO | NO | NO |
| P46934 | NEDD4     | NO | NO | NO |
| P40222 | TXLNA     | NO | NO | NO |
| O60503 | ADCY9     | NO | NO | NO |
| O00541 | PES1      | NO | NO | NO |
| Q9BT78 | COPS4     | NO | NO | NO |
| Q9BW92 | TARS2     | NO | NO | NO |
| Q53EL6 | PDCD4     | NO | NO | NO |
| Q8NI60 | ADCK3     | NO | NO | NO |
| Q9BVS4 | RIOK2     | NO | NO | NO |
| O15438 | ABCC3     | NO | NO | NO |
| Q8N3C0 | ASCC3     | NO | NO | NO |
| Q9Y5Y0 | FLVCR1    | NO | NO | NO |
| Q6KC79 | NIPBL     | NO | NO | NO |
| P33897 | ABCD1     | NO | NO | NO |
| Q9BUB7 | TMEM70    | NO | NO | NO |
| P61421 | ATP6V0D1  | NO | NO | NO |
| Q12800 | TFCP2     | NO | NO | NO |
| P82933 | MRPS9     | NO | NO | NO |
| P10644 | PRKAR1A   | NO | NO | NO |
| Q53H12 | AGK       | NO | NO | NO |
| Q96BD0 | SLCO4A1   | NO | NO | NO |
| Q9H8Y8 | GORASP2   | NO | NO | NO |
| A8MPP1 | DDX11L8   | NO | NO | NO |
| Q9Y6E0 | STK24     | NO | NO | NO |
| Q9HC21 | SLC25A19  | NO | NO | NO |
| Q8TCG1 | KIAA1524  | NO | NO | NO |
| Q86XL3 | ANKLE2    | NO | NO | NO |
| Q93050 | ATP6V0A1  | NO | NO | NO |
| P55039 | DRG2      | NO | NO | NO |
| Q13395 | TARBP1    | NO | NO | NO |

|        |          |    |    |    |
|--------|----------|----|----|----|
| P41440 | SLC19A1  | NO | NO | NO |
| P42025 | ACTR1B   | NO | NO | NO |
| Q96NT5 | SLC46A1  | NO | NO | NO |
| P48147 | PREP     | NO | NO | NO |
| Q03519 | TAP2     | NO | NO | NO |
| Q13188 | STK3     | NO | NO | NO |
| Q14914 | PTGR1    | NO | NO | NO |
| P20839 | IMPDH1   | NO | NO | NO |
| Q15599 | SLC9A3R2 | NO | NO | NO |
| Q9BXW7 | CECR5    | NO | NO | NO |
| Q9H0H5 | RACGAP1  | NO | NO | NO |
| Q9GZZ1 | NAA50    | NO | NO | NO |
| P17480 | UBTF     | NO | NO | NO |
| Q53EP0 | FNDC3B   | NO | NO | NO |
| Q9P015 | MRPL15   | NO | NO | NO |
| Q15286 | RAB35    | NO | NO | NO |
| Q6IAN0 | DHRS7B   | NO | NO | NO |
| Q96A49 | SYAP1    | NO | NO | NO |
| Q9UII4 | HERC5    | NO | NO | NO |
| P48449 | LSS      | NO | NO | NO |
| O14734 | ACOT8    | NO | NO | NO |
| Q14692 | BMS1     | NO | NO | NO |
| P30085 | CMPK1    | NO | NO | NO |
| Q9BZE1 | MRPL37   | NO | NO | NO |
| Q9HCU5 | PREB     | NO | NO | NO |
| P83111 | LACTB    | NO | NO | NO |
| Q7L8L6 | FASTKD5  | NO | NO | NO |
| P20585 | MSH3     | NO | NO | NO |
| Q9NP79 | VTA1     | NO | NO | NO |
| P18754 | RCC1     | NO | NO | NO |
| Q8IWA4 | MFN1     | NO | NO | NO |
| Q7Z2T5 | TRMT1L   | NO | NO | NO |
| Q15785 | TOMM34   | NO | NO | NO |
| O14964 | HGS      | NO | NO | NO |
| Q13769 | THOC5    | NO | NO | NO |
| O00411 | POLRMT   | NO | NO | NO |
| O95071 | UBR5     | NO | NO | NO |
| Q96SB4 | SRPK1    | NO | NO | NO |
| O95155 | UBE4B    | NO | NO | NO |
| P35237 | SERPINB6 | NO | NO | NO |
| O60443 | DFNA5    | NO | NO | NO |
| Q15005 | SPCS2    | NO | NO | NO |
| Q15126 | PMVK     | NO | NO | NO |
| P42695 | NCAPD3   | NO | NO | NO |
| Q08AM6 | VAC14    | NO | NO | NO |
| Q01433 | AMPD2    | NO | NO | NO |
| O15228 | GNPAT    | NO | NO | NO |
| Q86X55 | CARM1    | NO | NO | NO |
| Q9NXF1 | TEX10    | NO | NO | NO |
| Q96S55 | WRNIP1   | NO | NO | NO |
| Q8IWX8 | CHERP    | NO | NO | NO |

|        |          |    |    |    |
|--------|----------|----|----|----|
| Q13347 | EIF3I    | NO | NO | NO |
| P50995 | ANXA11   | NO | NO | NO |
| Q96R06 | SPAG5    | NO | NO | NO |
| Q9Y6G9 | DYNC1LI1 | NO | NO | NO |
| Q92520 | FAM3C    | NO | NO | NO |
| Q1KMD3 | HNRNPUL2 | NO | NO | NO |
| P18433 | PTPRA    | NO | NO | NO |
| P43003 | SLC1A3   | NO | NO | NO |
| Q15800 | MSMO1    | NO | NO | NO |
| O95870 | ABHD16A  | NO | NO | NO |
| P48067 | SLC6A9   | NO | NO | NO |
| O15431 | SLC31A1  | NO | NO | NO |
| Q92879 | CELF1    | NO | NO | NO |
| O15294 | OGT      | NO | NO | NO |
| P11388 | TOP2A    | NO | NO | NO |
